# Supplementary material
Source: HighWire-hosted journal article supplement (https://www.cmaj.ca/highwire/filestream/59474/field_highwire_adjunct_files/9/150462-res-7-at.pdf)
Supplement: 150462-res-7-at.pdf [file 150462-res-7-at.pdf]

**Appendix 7 (as supplied by the authors): Risk of decline in functional status in tertiles of resting heart rate and SDNN after inclusion of participants with maximum functional status at baseline**

|                   | Tertiles of HR/SDNN |                  |                  | P for trend |
|-------------------|---------------------|------------------|------------------|-------------|
|                   | Low                 | Middle           | High             |             |
| <b>Heart Rate</b> |                     |                  |                  |             |
| ADL, OR (95% CI)  | n=1465              | n=1491           | n=1387           |             |
| Model 1           | 1 (ref)             | 1.25 [1.00;1.57] | 1.75 [1.41;2.18] | <0.001      |
| Model 2           | 1 (ref)             | 1.34 [1.06;1.70] | 1.88 [1.48;2.40] | <0.001      |
| IADL, OR (95% CI) | n=1397              | n=1433           | n=1299           |             |
| Model 1           | 1 (ref)             | 1.14 [0.94;1.39] | 1.35 [1.10;1.65] | 0.003       |
| Model 2           | 1 (ref)             | 1.19 [0.97;1.46] | 1.42 [1.14;1.76] | 0.002       |
| <b>SDNN</b>       |                     |                  |                  |             |
| ADL, OR (95% CI)  | n=1441              | n= 1428          | n= 1474          |             |
| Model 1           | 1.19 [0.97;1.46]    | 0.78 [0.63;0.98] | 1 (ref)          | 0.09        |
| Model 2           | 1.13 [0.92;1.40]    | 0.77 [0.61;0.96] | 1 (ref)          | 0.23        |
| IADL, OR (95% CI) | n=1350              | n=1383           | n=1396           |             |
| Model 1           | 1.29 [1.06;1.56]    | 1.12 [0.92;1.36] | 1 (ref)          | 0.01        |
| Model 2           | 1.26 [1.03;1.53]    | 1.10 [0.90;1.34] | 1 (ref)          | 0.02        |

Abbreviations: HR: Heart Rate; SDNN: Standard Deviation of the Normal to Normal R-R intervals; n: Number; msec: milliseconds; ADL: basic Activities of Daily Living; IADL: Instrumental Activities of Daily Living; OR: Odds Ratio; CI: Confidence Interval. Model 1: adjusted for country, age, sex, education. Model 2: adjusted for country, age, sex, education, smoking, body mass index, history of hypertension, history of diabetes mellitus, history of claudication, history of myocardial infarction, history of stroke/transient ischemic attack, statin treatment, diuretics, angiotensin converting enzyme inhibitors, angiotensin receptor blockers, beta-blockers, calcium-channel blockers, nitrates, aspirin and anticoagulants.
